# Supplementary material for: Hybrid preparation of terbium(iii)-doped mesoporous silica particles with calcium phosphates
Source: Royal Society of Chemistry journal article supplement (doi:10.1039/c6ra28457d), 2017-01-01
Supplement: c6ra28457d1.pdf [file c6ra28457d1.pdf]

## Supporting Information

# Hybrid Preparation of Terbium(III)-doped Mesoporous Silica Particles with Calcium Phosphates

**Takuya Kataoka,<sup>a</sup> Kota Shiba,<sup>\*b</sup> Li Ying Wang,<sup>a</sup> Shota Yamada<sup>a</sup>  
and Motohiro Tagaya<sup>a,c</sup>**

*a. Department of Materials Science and Technology, Nagaoka University of Technology, 1603-1 Kamitomioka, Nagaoka, Niigata 940-2188, Japan*

*b. World Premier International Research Center Initiative (WPI), International Center for Materials Nanoarchitectonics (MANA), National Institute for Materials Science (NIMS), 1-1 Namiki, Tsukuba, Ibaraki 305-0044, Japan*

*c. Top Runner Incubation Center for Academia-Industry Fusion, Nagaoka University of Technology, 1603-1 Kamitomioka, Nagaoka, Niigata 940-2188, Japan*

---

**\* Author to whom correspondence should be addressed:**

Tel: +81-29-860-4603; Fax: +81-29-860-4706, E-mail: SHIBA.Kota@nims.go.jp

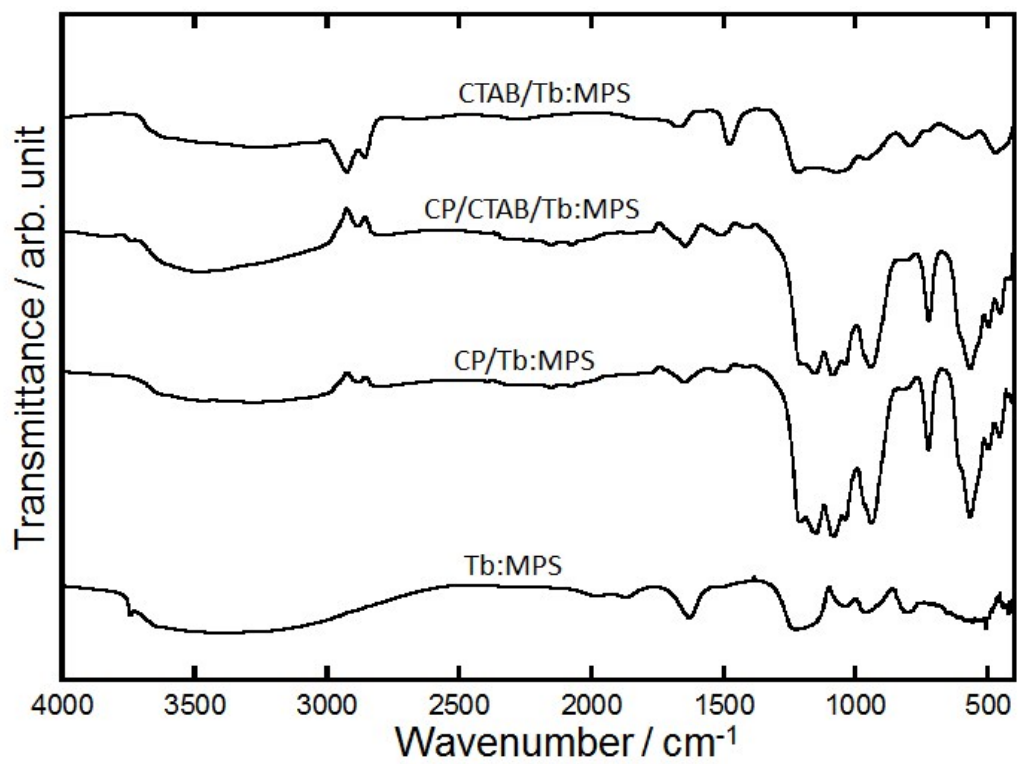

**Fig. S1** FT-IR spectra of the CTAB/Tb:MPS, CP/CTAB/Tb:MPS, CP/Tb:MPS and Tb:MPS.
